# Supplementary material for: Effects of oat protein supplementation on skeletal muscle damage, inflammation and performance recovery following downhill running in untrained collegiate men
Source: Royal Society of Chemistry journal article supplement (doi:10.1039/c8fo00786a), 2018-01-01
Supplement: c8fo00786a1.pdf [file c8fo00786a1.pdf]

Supplementary data: Daily total dietary energy intake and macronutrient (g/day) ingestion during the 15 days course

|                           |        | -10 day | -9 day  | -8 day         | -7 day  | -6 day | -5 day  | -4 day  | -3 day  | -2 day  | -1 day  | 0       | 1 day   | 2 day   | 3 day               | 4 day   |
|---------------------------|--------|---------|---------|----------------|---------|--------|---------|---------|---------|---------|---------|---------|---------|---------|---------------------|---------|
| Energy<br>(kcal/d)        | O      | 2750.3  | 2751.6  | 2786.4         | 2797.8  | 2734.3 | 2706.6  | 2752.9  | 2622.1  | 2735.6  | 2652.1  | 2695.6  | 2681.9  | 2656.0  | 2673.3±             | 2737.9  |
|                           | P      | ±135.5  | ±122.9  | ±190.0         | ±106.6  | ±88.5  | ±192.5  | ±171.5  | ±181.7  | ±190.4  | ±183.4  | ±152.7  | ±128.0  | ±129.6  | 147.9               | ±131.6  |
|                           | P      | 2735.0  | 2728.4  | 2760.6         | 2772.0  | 2794.3 | 2714.0  | 2702.0  | 2692.8  | 2687.6  | 2654.6  | 2756.4  | 2653.0  | 2682.1  | 2601.3±             | 2670.9  |
|                           | L<br>A | ±181.7  | ±175.6  | ±109.9         | ±87.3   | ±91.5  | ±133.8  | ±169.3  | ±181.6  | ±194.3  | ±168.4  | ±158.2  | ±131.5  | ±147.8  | 137.2 <sup>##</sup> | ±130.1  |
| Carbohy<br>drate<br>(g/d) | O      | 342.6±  | 346.7±  | 346.7±         | 345.7±  | 343.6± | 338.4±  | 349.4±  | 339.1±  | 343.4±  | 343.4±  | 342.5±  | 343.2±  | 343.3±  | 346.0±7.            | 350.2±  |
|                           | P      | 11.3    | 8.0     | 7.7            | 9.5     | 8.4    | 9.5     | 13.4    | 9.2     | 12.0    | 11.7    | 9.8     | 7.4     | 7.5     | 4                   | 7.3     |
|                           | P      | 347.6±  | 342.7±  | 346.9±         | 343.9±  | 342.7± | 340.3±  | 345.2±  | 342.3±  | 343.5±  | 340.0±  | 347.7±  | 342.4±  | 347.5±  | 345.2±7.            | 349.0±  |
|                           | L<br>A | 10.2    | 7.8     | 8.4            | 9.7     | 9.3    | 8.1     | 10.5    | 15.5    | 10.6    | 8.8     | 10.2    | 6.7     | 8.6     | 5                   | 6.4     |
| Fat<br>(g/d)              | O      | 73.9±6. | 72.0±5. | 71.6±5.        | 71.2±6. | 72.5±5 | 71.8±3. | 71.0±3. | 69.2±6. | 72.2±7. | 69.3±6. | 72.9±4. | 72.6±3. | 71.7±4. | 70.6±4.8            | 73.2±4. |
|                           | P      | 4       | 5       | 2              | 5       | .0     | 8       | 9       | 7       | 0       | 8       | 3       | 9       | 6       | 6                   |         |
|                           | P      | 72.6±5. | 71.8±6. | 71.6±5.        | 74.0±4. | 72.7±1 | 71.8±4. | 74.5±4. | 72.6±7. | 73.3±6. | 71.9±6. | 74.9±4. | 70.6±4. | 72.7±4. | 70.7±4.6            | 71.4±3. |
|                           | L<br>A | 6       | 2       | 6              | 4       | .9     | 6       | 5       | 2       | 7       | 3       | 8       | 9       | 6       | #                   | 8       |
| Protein<br>(g/d)          | O      | 84.1±6. | 84.0±6. | 83.7±4.        | 85.2±6. | 84.4±5 | 84.6±4. | 85.3±5. | 81.5±8. | 84.0±8. | 82.6±7. | 86.4±4. | 88.3±6. | 87.4±6. | 86.6±5.5            | 86.9±5. |
|                           | P      | 0       | 0       | 2              | 0       | .1     | 9       | 5       | 1       | 8       | 3       | 3       | 3       | 1       | 4                   |         |
|                           | P      | 83.5±5. | 84.0±5. | 82.3±6.        | 81.9±5. | 83.9±6 | 82.3±3. | 85.2±6. | 84.2±7. | 84.0±7. | 81.4±5. | 87.4±5. | 87.2±5. | 87.1±4. | 84.3±4.7            | 85.5±5. |
|                           | L<br>A | 1       | 1       | 1 <sup>#</sup> | 9       | .1     | 6       | 5       | 7       | 0       | 6       | 7       | 1       | 8       | 1                   |         |

Supplements were not included. Values are provided as mean ± standard deviation for each group (n = 8). OP: oats protein; PLA: placebo. Energy: Mauchly's test of sphericity:  $P = 0.001$ ; time: within-subjects effects  $F = 1.542$ ,  $P = 0.172$ ; time × group: within-subjects effects  $F = 0.380$ ,  $P = 0.895$ ; group: between-subjects effects  $F = 0.124$ ,  $P = 0.730$ . Carbohydrate: Mauchly's test of sphericity:  $P < 0.01$ ; time: within-subjects effects  $F = 1.288$ ,  $P = 0.271$ ; time × group: within-subjects effects  $F = 0.446$ ,  $P = 0.848$ ; group: between-subjects effects  $F = 0.012$ ,  $P = 0.914$ . Fats: Mauchly's test of sphericity:  $P = 0.014$ ; time: within-subjects effects  $F = 0.520$ ,  $P = 0.800$ ; time × group: within-subjects effects  $F = 0.482$ ,  $P = 0.828$ ; group: between-subjects effects  $F = 0.751$ ,  $P = 0.401$ . Protein: Mauchly's test of sphericity:  $P = 0.112$ ; time: within-subjects effects  $F = 1.414$ ,  $P = 0.149$ ; time × group: within-subjects effects  $F = 0.244$ ,  $P = 0.998$ ; group: between-subjects effects  $F = 0.747$ ,  $P = 0.402$ . \*  $P < 0.05$  versus the PLA group; \*\*  $P < 0.01$  versus the PLA group; #  $P < 0.05$  versus testing day; ##  $P < 0.01$  versus testing day.
